# Supplementary material for: Glibenclamide Nanocrystal-Loaded Bioactive Polymeric Scaffolds for Skin Regeneration: In Vitro Characterization and Preclinical Evaluation
Source: MDPI journal article supplement (doi:10.3390/pharmaceutics13091469), 2021-09-14
Supplement: s1 [file s1]

# Supplementary Materials: Glibenclamide Nanocrystal-Loaded Bioactive Polymeric Scaffolds for Skin Regeneration: In Vitro Characterization and Preclinical Evaluation

Julie R. Youssef, Nabila A. Boraie, Heba Fathy Ibrahim, Fatma A. Ismail and Riham M. El-Moslemany

**Table S1.** Drug release kinetics data.

|                  | SC3-1 |       | SC3-2 |       | SC6-1 |       | SC6-2 |       |
|------------------|-------|-------|-------|-------|-------|-------|-------|-------|
|                  | r     | MSE   | r     | MSE   | r     | MSE   | r     | MSE   |
| First order      | 0.81  | 364.8 | 0.82  | 416   | 0.90  | 125.9 | 0.88  | 253   |
| Higuchi          | 0.87  | 184.3 | 0.84  | 244   | 0.95  | 42    | 0.91  | 122.5 |
| Korsmeyer-Peppas | 0.95  | 40    | 0.93  | 77    | 0.97  | 16    | 0.96  | 44.5  |
| Hixon-Crowell    | 0.78  | 419   | 0.78  | 493.6 | 0.89  | 139   | 0.85  | 303.8 |
| Baker-Lonsdale   | 0.89  | 134.8 | 0.88  | 172.5 | 0.95  | 34    | 0.93  | 84    |
